# Supplementary material for: Evaluation of Daptomycin Non-Susceptible Staphylococcus aureus for Stability, Population Profiles, mprF Mutations, and Daptomycin Activity
Source: Springer Nature journal article supplement (doi:10.1007/s40121-013-0021-7), 2013-11-28
Supplement: MOESM1 [file 9339604]

- A large collection of daptomycin non-susceptible clinical isolates (n=12) were evaluated for minimum inhibitory concentration values (MIC), stability, and daptomycin population analysis profiles (PAPs).
- All 12 isolates displayed stability on serial passage, MIC values of 2-4 mg/L and area under the curve (AUC) values from 14.01 - 26.85 with variability among isolates with the same MIC value.
- When isolates with the same MIC value were compared in an in vitro pharmacokinetic/pharmacodynamic (PK/PD) model against daptomycin 6 and 10 mg/kg/day for 96 hours, isolates with smaller AUC values (left shift) displayed sustained bactericidal activity versus isolates with larger AUC values (right shift) which displayed a pattern of re-growth.
- Analysis of isolates recovered at 96 hours in the in vitro PK/PD model revealed an increase in the daptomycin AUC on PAP but no increase in MIC in the overall population.
- Analysis of an isolate recovered at 96 h in the in vitro PK/PD model revealed a novel Q326Stop mutation in *mprf*, hypothesized to render the mprF protein non-functional.

This summary slide represents the opinions of the authors, and not necessarily the opinions of the publisher or editorial board. This material has been peer reviewed. Sponsorship for this study and summary slide was funded by an investigator initiated grant from Cubist pharmaceuticals. For a full list of acknowledgments and conflicts of interest for all authors of this article, please see the full text online.
